# Supplementary material
Source: PubMed Central journal article supplement (PMC8810686)

**A**

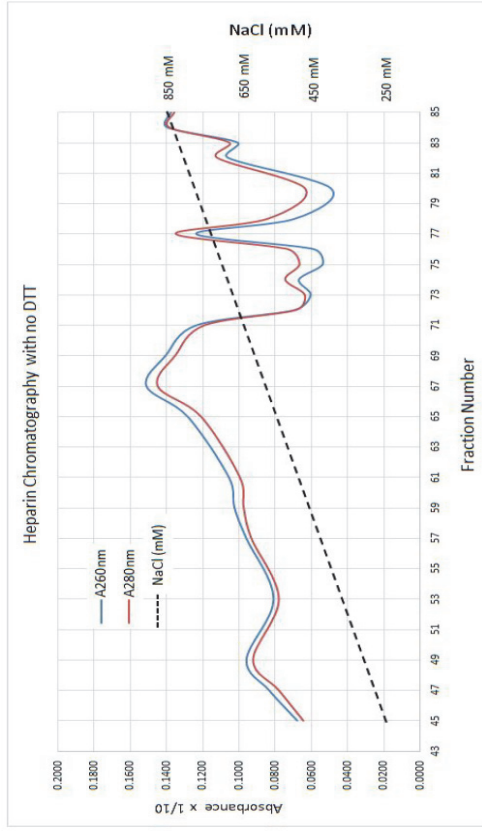

**B**

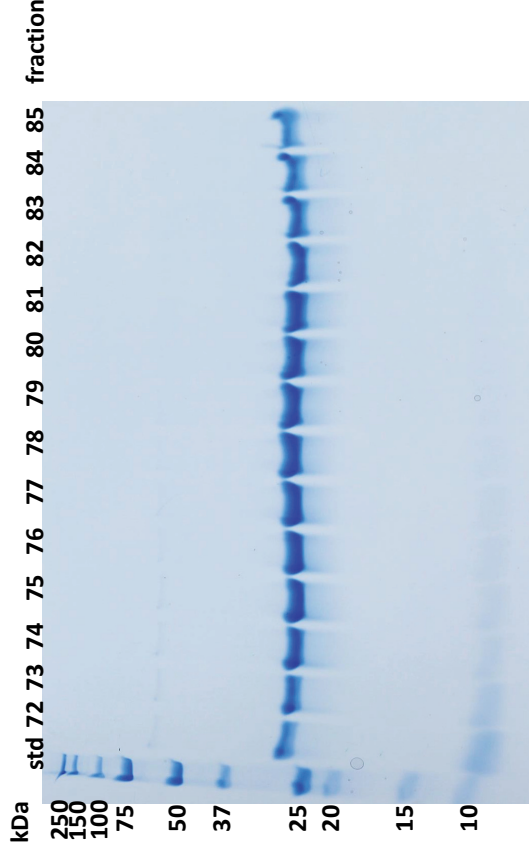

**Supplementary Fig. 1. Purification of Tat-PY-C-Smad7 by heparin chromatography. A:** Heparin chromatograph. **B:** SDS gel loaded with heparin fractions.

| Sun                                               | Mon                                               | Tues                                              | Wed                                               | Thu                                               | Fri                                                                        | Sat |
|---------------------------------------------------|---------------------------------------------------|---------------------------------------------------|---------------------------------------------------|---------------------------------------------------|----------------------------------------------------------------------------|-----|
|                                                   | Dogs Arrive                                       |                                                   | Lab work, pre-biopsy                              |                                                   |                                                                            |     |
| <b>Week1</b>                                      | <b>RT</b>                                         | <b>RT</b>                                         | <b>RT</b>                                         | <b>RT</b>                                         | <b>RT</b>                                                                  |     |
| <b>Week2<br/>Tat-PYC-<br/>Smad7<br/>treatment</b> | <b>Dose X: Oral<br/>Treatment<br/>VRTOG score</b>                          |     |
| <b>Week3<br/>Tat-PYC-<br/>Smad7<br/>treatment</b> | <b>Dose X: Oral<br/>Treatment<br/>VRTOG score</b> | <b>Dose X: Oral<br/>Treatment<br/>Biopsy, Lab<br/>work<br/>VRTOG score</b> |     |
| <b>Week4</b>                                      | <b>VRTOG score</b>                                                         |     |

Supplementary Fig. 2. Clinical protocol of IMRT-induced oral mucositis and Tat-PYC-Smad7 treatment schedule.

| 27 Nanostring Functional Annotation Gene Categories | # Genes |
|-----------------------------------------------------|---------|
| Angiogenesis                                        | 61      |
| Antigen Presentation                                | 56      |
| Apoptosis                                           | 52      |
| Autophagy                                           | 23      |
| Cell Proliferation                                  | 32      |
| Complement System                                   | 33      |
| Costimulatory Signaling                             | 67      |
| Cytokine And Chemokine Signaling                    | 305     |
| Cytotoxicity                                        | 38      |
| DNA Damage Repair                                   | 18      |
| Epigenetic Regulation                               | 24      |
| Hedgehog Signaling                                  | 7       |
| Hypoxia                                             | 51      |
| Immune Cell Adhesion And Migration                  | 77      |
| Interferon Signaling                                | 47      |
| Internal Reference Gene                             | 20      |
| JAK-STAT Signaling                                  | 75      |
| Lymphoid Compartment                                | 81      |
| MAPK                                                | 46      |
| Matrix Remodeling And Metastasis                    | 44      |
| Metabolic Stress                                    | 32      |
| Myeloid Compartment                                 | 66      |
| NF-kB Signaling                                     | 76      |
| Notch Signaling                                     | 6       |
| PI3K-Akt                                            | 55      |
| TGF-beta Signaling                                  | 12      |
| Wnt Signaling                                       | 15      |

  

| Subcategory of secreted cytokines and chemokines | # Genes |
|--------------------------------------------------|---------|
| Secreted cytokines & chemokines                  | 93      |

**Supplementary Fig. 3. Nanostring Functional Annotation Categories.** The NanoString nCounter Canine IO panel includes 800 genes which are assigned to one or more of 27 functional categories. The largest category, Cytokine and Chemokine Signaling, contains 305 genes. We separated out the secreted cytokines and chemokines into a 28<sup>th</sup> functional category.

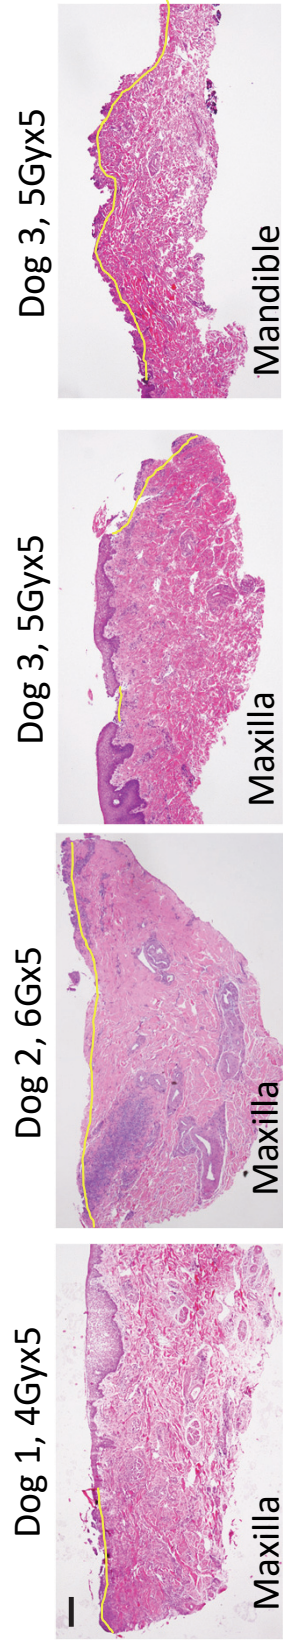

**Supplementary Fig. 4. Histology of Tat-PYC-Smad7 treated dog mucositis with different IMRT doses. All dogs were treated with mock gel only. Yellow lines delineates the lengths of ulcerated lesions. Scale bar: 200 $\mu$ m for all sections.**

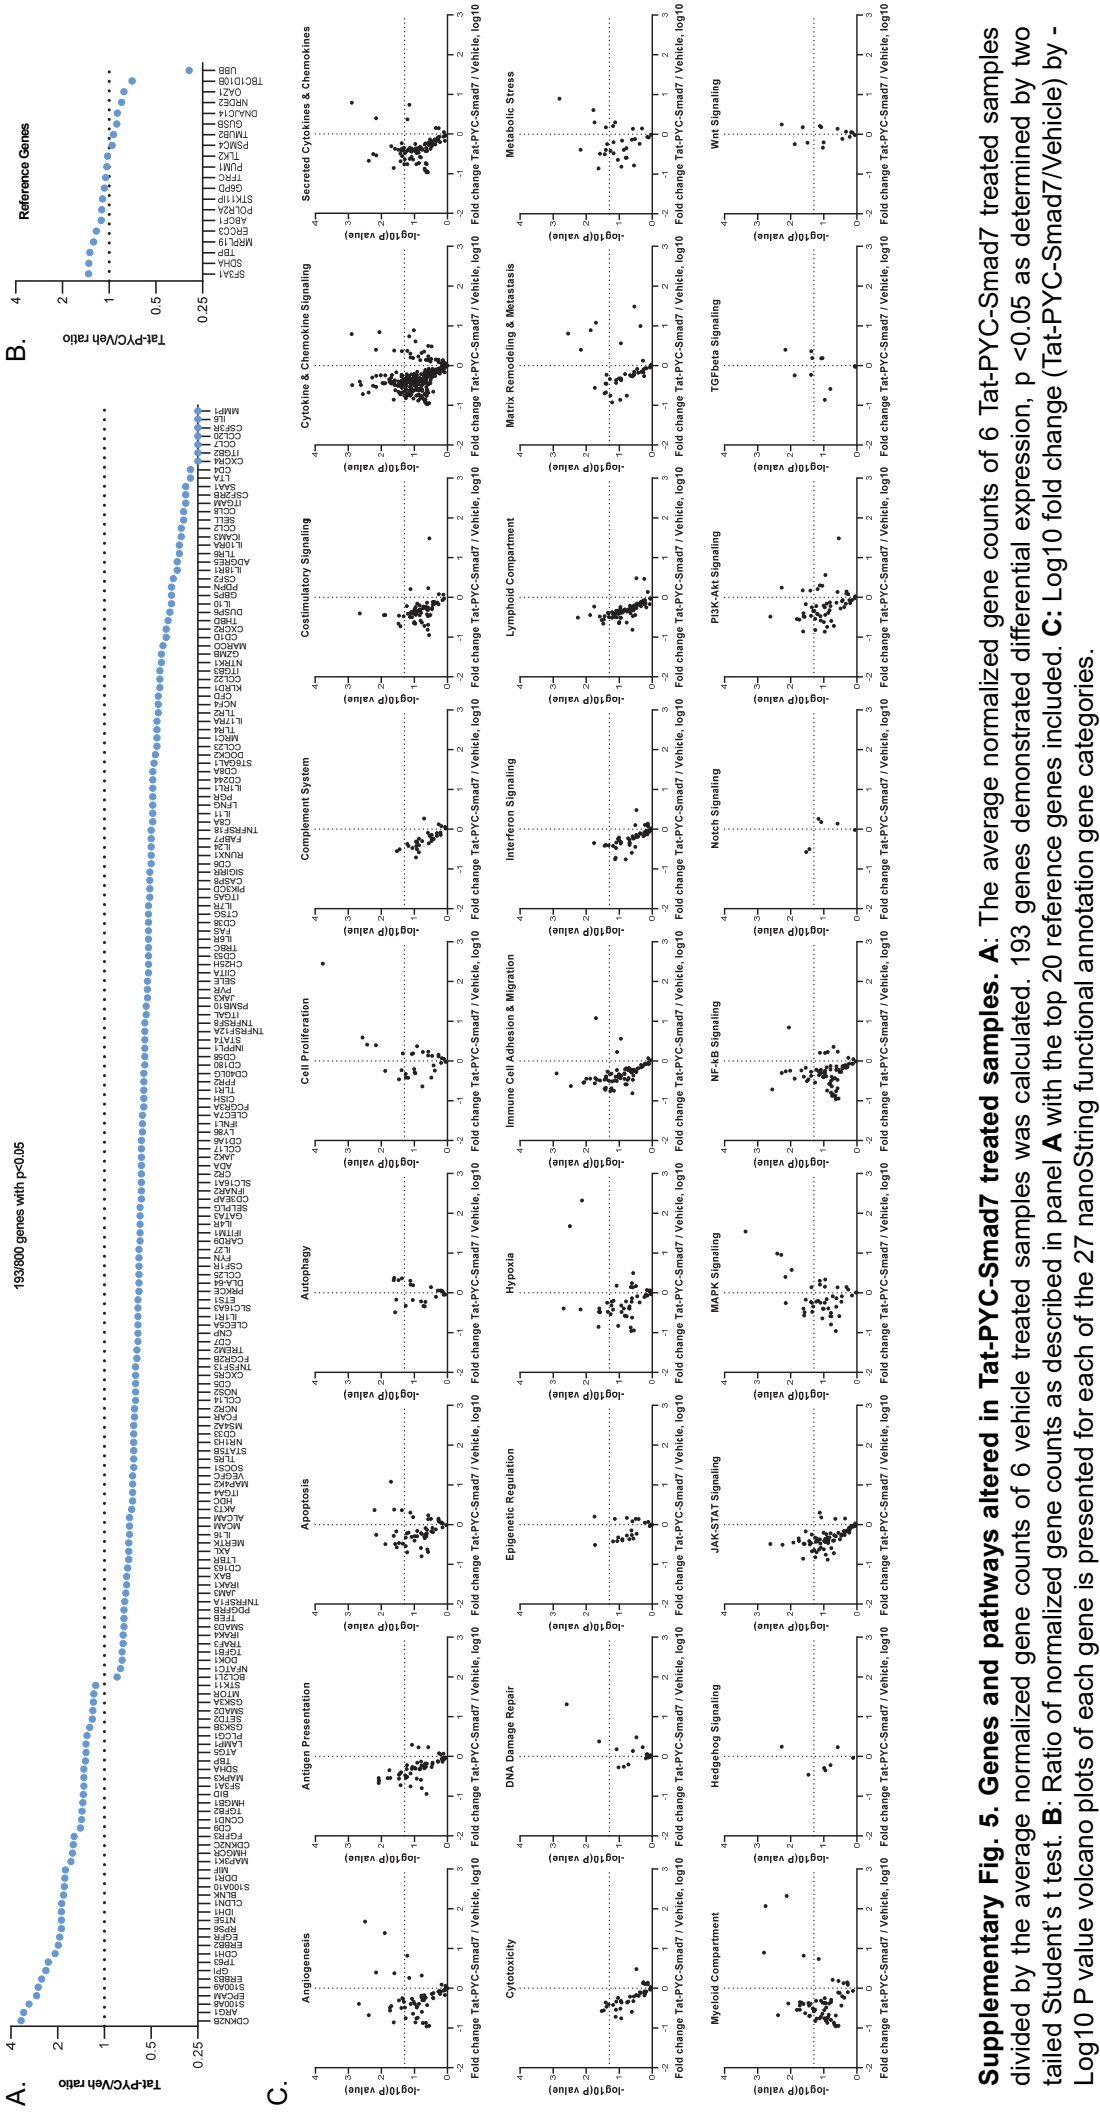

Supplement: NIHMS1751530-supplement-Supplementary_Figures.pdf [file NIHMS1751530-supplement-Supplementary_Figures.pdf]
