# Supplementary material
Source: PubMed Central journal article supplement (PMC8810686)
Supplement: NIHMS1751530-supplement-Supplementary_Clin_Data.pdf [file NIHMS1751530-supplement-Supplementary_Clin_Data.pdf]

dog 1

TOPICAL PROPRIETARY BIOLO

CAN

N

Report To:

Report Time: 12/21/18 12:04

Slides/Tubes: RTT

Collected: 12/21/2018 09:00

Accessioned: 12/21/2018 09:50

Completed: 12/21/18 12:04

CHEMISTRY  
RESEARCH SADP

| RESULT STATUS    | FINAL |             |         |
|------------------|-------|-------------|---------|
| Tech 1/Comment   | LRJ   |             |         |
| GLUCOSE          | 108   | 70 - 115    | mg/dl   |
| BUN              | 11    | 7 - 30      | mg/dl   |
| CREATININE       | 0.6   | 0.6 - 1.6   | mg/dl   |
| PHOSPHORUS       | 5.0   | 2.5 - 6.0   | mg/dl   |
| CALCIUM          | 10.3  | 9.0 - 11.5  | mg/dl   |
| MAGNESIUM        | 2.0   | 1.8 - 2.4   | mg/dl   |
| Total Protein    | 5.9   | 5.0 - 7.0   | G/dl    |
| ALBUMIN          | 3.5   | 3.0 - 4.3   | G/dl    |
| GLOBULIN         | 2.4   | 1.5 - 3.2   | G/dl    |
| A/G RATIO        | 1.46  | 0.9 - 2.4   | RATIO   |
| CHOLESTEROL      | 190   | 130 - 300   | mg/dl   |
| CK               | 150   | 50 - 275    | IU/L    |
| T-BILIRUBIN      | 0.1   | 0.0 - 0.2   | mg/dl   |
| ALP              | 33    | 15 - 140    | IU/L    |
| ALT              | 24    | 10 - 90     | IU/L    |
| AST              | 18    | 15 - 45     | IU/L    |
| GGT              | 2     | 0 - 9       | IU/L    |
| SODIUM           | 147   | 142 - 152   | mEQ/L   |
| POTASSIUM        | 4.65  | 3.9 - 5.4   | mEQ/L   |
| CHLORIDE         | 110.5 | 108 - 118   | mEQ/L   |
| BICARB(HCO3-)    | 19.3  | 15 - 25     | mEQ/L   |
| ANION GAP        | 22    | 12 - 23     | mmol/L  |
| CALC. OSMOLALITY | 292   | H 260 - 290 | mOsm/Kg |
| LIPEMIA          | 7     | 0 - 80      | mg/dl   |
| HEMOLYSIS        | 19    | 0 - 100     | mg/dl   |
| ICTERUS          | 0     | 0 - 1       | mg/dl   |

Roche Cobas c50I analyzer results.

dog 1

TOPICAL PROPRIETARY BIOLO

CAN

N

Report To:

Report Time: 12/21/18 11:41

Slides/Tubes: PTT

Collected: 12/21/2018 09:00

Accessioned: 12/21/2018 09:49

Completed: 12/21/18 11:41

### HEMATOLOGY

Complete Blood Count

| RESULT STATUS   | FINAL |             |                     |  |
|-----------------|-------|-------------|---------------------|--|
| Tech 1/Comment  | KBS   |             |                     |  |
| Tech 2/Comment  | SEL   |             |                     |  |
| HGB             | 17.9  | 13.0 - 20.0 | G/dl                |  |
| HGB (cell)      | 17.9  | 13 - 20     | G/dl                |  |
| HCT             | 53    | 40 - 55     | %                   |  |
| RBC             | 7.61  | 5.5 - 8.5   | 10 <sup>6</sup> /ul |  |
| MCV             | 69    | 62 - 74     | fl                  |  |
| RDW             | 12.9  | 12 - 15     | %                   |  |
| MCHC            | 34    | 33 - 36     | G/dl                |  |
| CHCM            | 34    | 33 - 36     | G/dl                |  |
| PLATELETS       | 483   | 200 - 500   | 10 <sup>3</sup> /ul |  |
| MPV             | 11.8  | 7.5 - 14.6  | fl                  |  |
| NUCLEATED CELLS | 8.4   | 4.5 - 15.0  | 10 <sup>3</sup> /ul |  |

### Differential Count

|                   |        |            |                     |    |
|-------------------|--------|------------|---------------------|----|
| BANDS#            | 0.0    | 0 - 0.2    | BANDS%              | 0  |
| NEUTROPHIL#       | 6.0    | 2.6 - 11   | NEUTROPHIL%         | 72 |
| LYMPHOCYTE#       | 1.8    | 1 - 4.8    | LYMPHOCYTE%         | 21 |
| MONOCYTE#         | 0.4    | 0.2 - 1.0  | MONOCYTE%           | 5  |
| EOSINOPHIL#       | 0.2    | 0.1 - 1.2  | EOSINOPHIL%         | 2  |
| DIFF%             | 100.0  |            | %                   |    |
| Clumped Platelets | Absent |            |                     |    |
| NEUTROPHIL# auto  | 5.3    | 2.6 - 11.0 | 10 <sup>3</sup> /ul |    |

dog 2

TOPICAL PROPRIETARY BIOLO

CAN

N

Report To:

Report Time: 04/19/19 12:53

Slides/Tubes: RTT

Clinic:

Source:

Other:

Collected: 04/19/2019 12:22

Accessioned: 04/19/2019 12:22

Completed: 04/19/19 12:53

CHEMISTRY  
RESEARCH SADP

| RESULT STATUS    | FINAL |   |            |         |
|------------------|-------|---|------------|---------|
| Chemistry Tech.  | CLP   |   |            |         |
| GLUCOSE          | 107   |   | 70 - 115   | mg/dl   |
| BUN              | 14    |   | 7 - 30     | mg/dl   |
| CREATININE       | 0.5   | L | 0.6 - 1.6  | mg/dl   |
| PHOSPHORUS       | 5.9   |   | 2.5 - 6.0  | mg/dl   |
| CALCIUM          | 9.2   |   | 9.0 - 11.5 | mg/dl   |
| MAGNESIUM        | 1.8   |   | 1.8 - 2.4  | mg/dl   |
| Total Protein    | 5.5   |   | 5.0 - 7.0  | G/dl    |
| ALBUMIN          | 2.9   | L | 3.0 - 4.3  | G/dl    |
| GLOBULIN         | 2.6   |   | 1.5 - 3.2  | G/dl    |
| A/G RATIO        | 1.12  |   | 0.9 - 2.4  | RATIO   |
| CHOLESTEROL      | 194   |   | 130 - 300  | mg/dl   |
| CK               | 232   |   | 50 - 275   | IU/L    |
| T-BILIRUBIN      | 0.0   |   | 0.0 - 0.2  | mg/dl   |
| ALP              | 86    |   | 15 - 140   | IU/L    |
| ALT              | 23    |   | 10 - 90    | IU/L    |
| AST              | 25    |   | 15 - 45    | IU/L    |
| GGT              | 1     |   | 0 - 9      | IU/L    |
| SODIUM           | 145   |   | 142 - 152  | mEQ/L   |
| POTASSIUM        | 4.71  |   | 3.9 - 5.4  | mEQ/L   |
| CHLORIDE         | 111.9 |   | 108 - 118  | mEQ/L   |
| BICARB(HCO3-)    | 21.6  |   | 15 - 25    | mEQ/L   |
| ANION GAP        | 16    |   | 12 - 23    | mmol/L  |
| CALC. OSMOLALITY | 289   |   | 260 - 290  | mOsm/Kg |
| LIPEMIA          | 6     |   | 0 - 80     | mg/dl   |
| HEMOLYSIS        | 45    |   | 0 - 100    | mg/dl   |
| ICTERUS          | 0     |   | 0 - 1      | mg/dl   |

Roche Cobas c501 analyzer results.

dog 2

TOPICAL PROPRIETARY BIOLO

CAN

N

Report To:

Report Time: 04/19/19 13:38

Slides/Tubes: PTT

Collected: 04/19/2019 12:21

Accessioned: 04/19/2019 12:22

Completed: 04/19/19 13:38

### HEMATOLOGY

Complete Blood Count

| RESULT STATUS      | FINAL |   |             |                     |
|--------------------|-------|---|-------------|---------------------|
| Hematology Tech. 1 | LRJ   |   |             |                     |
| Hematology Tech. 2 | LRJ   |   |             |                     |
| PLASMA PROTEIN     | 6.2   |   | 6.0 - 7.5   | G/dl                |
| HGB                | 12.6  | L | 13.0 - 20.0 | G/dl                |
| HGB (cell)         | 12.6  | L | 13 - 20     | G/dl                |
| HCT                | 35    | L | 40 - 55     | %                   |
| RBC                | 5.38  | L | 5.5 - 8.5   | 10 <sup>6</sup> /ul |
| MCV                | 65    |   | 62 - 74     | fl                  |
| RDW                | 14.7  |   | 12 - 15     | %                   |
| MCHC               | 36    |   | 33 - 36     | G/dl                |
| CHCM               | 36    |   | 33 - 36     | G/dl                |
| PLATELETS          | 620   | H | 200 - 500   | 10 <sup>3</sup> /ul |
| MPV                | 9.0   |   | 7.5 - 14.6  | fl                  |
| NUCLEATED CELLS    | 10.8  |   | 4.5 - 15.0  | 10 <sup>3</sup> /ul |

### Differential Count

|                   |        |            |                     |    |
|-------------------|--------|------------|---------------------|----|
| BANDS#            | 0.0    | 0 - 0.2    | BANDS%              | 0  |
| NEUTROPHIL#       | 7.5    | 2.6 - 11   | NEUTROPHIL%         | 69 |
| LYMPHOCYTE#       | 2.7    | 1 - 4.8    | LYMPHOCYTE%         | 25 |
| MONOCYTE#         | 0.6    | 0.2 - 1.0  | MONOCYTE%           | 6  |
| DIFF%             | 100.0  |            | %                   |    |
| Clumped Platelets | Absent |            |                     |    |
| NEUTROPHIL# auto  | 6.9    | 2.6 - 11.0 | 10 <sup>3</sup> /ul |    |

dog 3

Animal:

CAN  
N

TOPICAL PROPRIETARY BIOLOGIC S

Received: RTT

Printed: 08/30/19 14:44

SS Accession #:

Collected: 08/30/2019 13:59

Accessioned: 08/30/2019 13:59

Completed: 08/30/19 14:44

**CHEMISTRY**  
RESEARCH SADP

|                           |       |   |            |         |
|---------------------------|-------|---|------------|---------|
| Chemistry Results Status: | FINAL |   |            |         |
| Chemistry Tech.           | JMJ   |   |            |         |
| GLUCOSE                   | 98    |   | 70 - 115   | mg/dl   |
| BUN                       | 11    |   | 7 - 30     | mg/dl   |
| CREATININE                | 0.5   | L | 0.6 - 1.6  | mg/dl   |
| PHOSPHORUS                | 4.9   |   | 2.5 - 6.0  | mg/dl   |
| CALCIUM                   | 9.0   |   | 9.0 - 11.5 | mg/dl   |
| MAGNESIUM                 | 1.7   | L | 1.8 - 2.4  | mg/dl   |
| Total Protein             | 4.9   | L | 5.0 - 7.0  | G/dl    |
| ALBUMIN                   | 2.8   | L | 3.0 - 4.3  | G/dl    |
| GLOBULIN                  | 2.1   |   | 1.5 - 3.2  | G/dl    |
| A/G RATIO                 | 1.33  |   | 0.9 - 2.4  | RATIO   |
| CHOLESTEROL               | 146   |   | 130 - 300  | mg/dl   |
| CK                        | 99    |   | 50 - 275   | IU/L    |
| T-BILIRUBIN               | 0.0   |   | 0.0 - 0.2  | mg/dl   |
| ALP                       | 32    |   | 15 - 140   | IU/L    |
| ALT                       | 22    |   | 10 - 90    | IU/L    |
| AST                       | 18    |   | 15 - 45    | IU/L    |
| GGT                       | 2     |   | 0 - 9      | IU/L    |
| SODIUM                    | 145   |   | 142 - 152  | mEQ/L   |
| POTASSIUM                 | 4.53  |   | 3.9 - 5.4  | mEQ/L   |
| CHLORIDE                  | 111.4 |   | 108 - 118  | mEQ/L   |
| BICARB(HCO3-)             | 22.2  |   | 15 - 25    | mEQ/L   |
| ANION GAP                 | 16    |   | 12 - 23    | mmol/L  |
| CALC. OSMOLALITY          | 287   |   | 260 - 290  | mOsm/Kg |
| LIPEMIA                   | 2     |   | 0 - 80     | mg/dl   |
| HEMOLYSIS                 | 6     |   | 0 - 100    | mg/dl   |
| ICTERUS                   | 0     |   | 0 - 1      | mg/dl   |

Roche Cobas c501 analyzer results.

dog 3

TOPICAL PROPRIETARY BIOLOGIC S

CAN  
N

Received: PTT

Printed: 08/30/19 15:01

SS Accession #:

Collected: 08/30/2019 13:59

Accessioned: 08/30/2019 13:59

Completed: 08/30/19 15:01

## HEMATOLOGY

Complete Blood Count

|                           |       |   |             |                     |
|---------------------------|-------|---|-------------|---------------------|
| Hematology Results Status | FINAL |   |             |                     |
| Hematology Tech. 1        | JMJ   |   |             |                     |
| Hematology Tech. 2        | LTS   |   |             |                     |
| PLASMA PROTEIN            | 5.8   | L | 6.0 - 7.5   | G/dl                |
| HGB                       | 15.7  |   | 13.0 - 20.0 | G/dl                |
| HGB (cell)                | 15.1  |   | 13 - 20     | G/dl                |
| HCT                       | 45    |   | 40 - 55     | %                   |
| RBC                       | 6.84  |   | 5.5 - 8.5   | 10 <sup>6</sup> /ul |
| MCV                       | 65    |   | 62 - 74     | fl                  |
| RDW                       | 14.3  |   | 12 - 15     | %                   |
| MCHC                      | 35    |   | 33 - 36     | G/dl                |
| CHCM                      | 34    |   | 33 - 36     | G/dl                |
| PLATELETS                 | 428   |   | 200 - 500   | 10 <sup>3</sup> /ul |
| MPV                       | 9.9   |   | 7.5 - 14.6  | fl                  |
| NUCLEATED CELLS           | 15.2  | H | 4.5 - 15.0  | 10 <sup>3</sup> /ul |

## Differential Count

|                   |        |   |            |                     |    |
|-------------------|--------|---|------------|---------------------|----|
| BANDS#            | 0.0    |   | 0 - 0.2    | BANDS%              | 0  |
| NEUTROPHIL#       | 12.9   | H | 2.6 - 11   | NEUTROPHIL%         | 85 |
| LYMPHOCYTE#       | 1.8    |   | 1 - 4.8    | LYMPHOCYTE%         | 12 |
| MONOCYTE#         | 0.3    |   | 0.2 - 1.0  | MONOCYTE%           | 2  |
| EOSINOPHIL#       | 0.2    |   | 0.1 - 1.2  | EOSINOPHIL%         | 1  |
| NEUTROPHIL# auto  | 12.1   | H | 2.6 - 11.0 | 10 <sup>3</sup> /ul |    |
| Clumped Platelets | Absent |   |            |                     |    |

CAN

M

TOPICAL PROPRIETARY BIOLOGIC

dog 4

Received: 1 RTT

Printed: 12/20/19 11:03

EMR Accession #:

Collected: 12/20/2019 10:12

Accessioned: 12/20/2019 10:12

Completed: 12/20/2019 11:03

CHEMISTRY  
RESEARCH SADP

| Chemistry Results Status: | FINAL |   |            |         |
|---------------------------|-------|---|------------|---------|
| Chemistry Tech.           | LTS   |   |            |         |
| GLUCOSE                   | 108   |   | 70 - 115   | mg/dl   |
| BUN                       | 14    |   | 7 - 30     | mg/dl   |
| CREATININE                | 0.6   |   | 0.6 - 1.6  | mg/dl   |
| PHOSPHORUS                | 3.5   |   | 2.5 - 6.0  | mg/dl   |
| CALCIUM                   | 9.5   |   | 9.0 - 11.5 | mg/dl   |
| MAGNESIUM                 | 1.7   | L | 1.8 - 2.4  | mg/dl   |
| Total Protein             | 5.2   |   | 5.0 - 7.0  | G/dl    |
| ALBUMIN                   | 2.8   | L | 3.0 - 4.3  | G/dl    |
| GLOBULIN                  | 2.4   |   | 1.5 - 3.2  | G/dl    |
| A/G RATIO                 | 1.17  |   | 0.9 - 2.4  | RATIO   |
| CHOLESTEROL               | 154   |   | 130 - 300  | mg/dl   |
| CK                        | 83    |   | 50 - 275   | IU/L    |
| T-BILIRUBIN               | 0.0   |   | 0.0 - 0.2  | mg/dl   |
| ALP                       | 42    |   | 15 - 140   | IU/L    |
| ALT                       | 23    |   | 10 - 90    | IU/L    |
| AST                       | 20    |   | 15 - 45    | IU/L    |
| GGT                       | 1     |   | 0 - 9      | IU/L    |
| SODIUM                    | 147   |   | 142 - 152  | mEQ/L   |
| POTASSIUM                 | 4.42  |   | 3.9 - 5.4  | mEQ/L   |
| CHLORIDE                  | 113.0 |   | 108 - 118  | mEQ/L   |
| BICARB(HCO3-)             | 21.9  |   | 15 - 25    | mEQ/L   |
| ANION GAP                 | 17    |   | 12 - 23    | mmol/L  |
| CALC. OSMOLALITY          | 293   | H | 260 - 290  | mOsm/Kg |
| LIPEMIA                   | 0     |   | 0 - 80     | mg/dl   |
| HEMOLYSIS                 | 6     |   | 0 - 100    | mg/dl   |
| ICTERUS                   | 0     |   | 0 - 1      | mg/dl   |

Roche Cobas c501 analyzer results.

CAN

M

TOPICAL PROPRIETARY BIOLOGIC

dog 4

Received: 1 PTT

Printed: 12/20/19 11:35

EMR Accession #:

Collected: 12/20/2019 10:12

Accessioned: 12/20/2019 10:12

Completed: 12/20/19 11:35

HEMATOLOGY  
CBC with Retic

Hematology Results Status FINAL  
Hematology Tech. 1 NAD  
Hematology Tech. 2 CLG

|                 |       |   |             |                     |
|-----------------|-------|---|-------------|---------------------|
| PLASMA PROTEIN  | 6.0   |   | 6.0 - 7.5   | G/dl                |
| HGB             | 15.0  |   | 13.0 - 20.0 | G/dl                |
| HGB (cell)      | 15.1  |   | 13 - 20     | G/dl                |
| HCT             | 42.3  |   | 40 - 55     | %                   |
| RBC             | 6.42  |   | 5.5 - 8.5   | 10 <sup>6</sup> /ul |
| MCV             | 66    |   | 62 - 74     | fl                  |
| RDW             | 15.3  | H | 12 - 15     | %                   |
| MCHC            | 35.5  |   | 33 - 36     | G/dl                |
| CHCM            | 35.6  |   | 33 - 36     | G/dl                |
| RETIC% auto     | 0.4   |   |             | %                   |
| RETICULOCYTES   | 29.0  |   | 0 - 100.0   | 10 <sup>3</sup> /ul |
| CH-Retic        | 25.3  |   | 22.3 - 27.9 | mg/dl               |
| MCV-Retic       | 90    |   | 78 - 100    | fl                  |
| PLATELETS       | 325   |   | 200 - 500   | 10 <sup>3</sup> /ul |
| MPV             | 15.4  | H | 7.5 - 14.6  | fl                  |
| NUCLEATED CELLS | 13.86 |   | 4.5 - 15.0  | 10 <sup>3</sup> /ul |

CBC-Differential Count

|                   |        |   |            |                     |    |
|-------------------|--------|---|------------|---------------------|----|
| BANDS#            | 0.0    |   | 0 - 0.2    | BANDS%              | 0  |
| NEUTROPHIL#       | 10.4   |   | 2.6 - 11   | NEUTROPHIL%         | 75 |
| LYMPHOCYTE#       | 2.2    |   | 1 - 4.8    | LYMPHOCYTE%         | 16 |
| MONOCYTE#         | 0.8    |   | 0.2 - 1.0  | MONOCYTE%           | 6  |
| EOSINOPHIL#       | 0.3    |   | 0.1 - 1.2  | EOSINOPHIL%         | 2  |
| nRBC#             | 0.1    | H | 0 - 0.001  | nRBC%               | 1  |
| NEUTROPHIL# auto  | 10.8   |   | 2.6 - 11.0 | 10 <sup>3</sup> /ul |    |
| Clumped Platelets | Absent |   |            |                     |    |



CAN

M

TOPICAL PROPRIETARY BIOLOGIC

dog 5

Received: RTT

Printed: 03/06/20 10:57

EMR Accession #:

Collected: 03/06/2020 09:45

Accessioned: 03/06/2020 09:50

Completed: 03/06/20 10:57

CHEMISTRY  
RESEARCH SADP

|                           |       |             |         |
|---------------------------|-------|-------------|---------|
| Chemistry Results Status: | FINAL |             |         |
| Chemistry Tech.           | CLP   |             |         |
| GLUCOSE                   | 114   | 70 - 115    | mg/dl   |
| BUN                       | 13    | 7 - 30      | mg/dl   |
| CREATININE                | 0.6   | 0.6 - 1.6   | mg/dl   |
| PHOSPHORUS                | 3.6   | 2.5 - 6.0   | mg/dl   |
| CALCIUM                   | 9.8   | 9.0 - 11.5  | mg/dl   |
| MAGNESIUM                 | 1.6   | L 1.8 - 2.4 | mg/dl   |
| Total Protein             | 6.1   | 5.0 - 7.0   | G/dl    |
| ALBUMIN                   | 3.5   | 3.0 - 4.3   | G/dl    |
| GLOBULIN                  | 2.6   | 1.5 - 3.2   | G/dl    |
| A/G RATIO                 | 1.35  | 0.9 - 2.4   | RATIO   |
| CHOLESTEROL               | 142   | 130 - 300   | mg/dl   |
| CK                        | 139   | 50 - 275    | IU/L    |
| T-BILIRUBIN               | 0.1   | 0.0 - 0.2   | mg/dl   |
| ALP                       | 55    | 15 - 140    | IU/L    |
| ALT                       | 33    | 10 - 90     | IU/L    |
| AST                       | 26    | 15 - 45     | IU/L    |
| GGT                       | 0     | 0 - 9       | IU/L    |
| SODIUM                    | 147   | 142 - 152   | mEQ/L   |
| POTASSIUM                 | 4.01  | 3.9 - 5.4   | mEQ/L   |
| CHLORIDE                  | 113.3 | 108 - 118   | mEQ/L   |
| BICARB(HCO3-)             | 19.1  | 15 - 25     | mEQ/L   |
| ANION GAP                 | 19    | 12 - 23     | mmol/L  |
| CALC. OSMOLALITY          | 292   | H 260 - 290 | mOsm/Kg |
| LIPEMIA                   | 2     | 0 - 80      | mg/dl   |
| HEMOLYSIS                 | 40    | 0 - 100     | mg/dl   |
| ICTERUS                   | 0     | 0 - 1       | mg/dl   |

Roche Cobas c501 analyzer results.

CAN

M

TOPICAL PROPRIETARY BIOLOGIC

dog 5

Received: PTT

Printed: 03/06/20 10:57

EMR Accession #:

Collected: 03/06/2020 09:45

Accessioned: 03/06/2020 09:50

Completed: 03/06/20 10:57

HEMATOLOGY  
CBC Complete Blood Count

Hematology Results Status FINAL  
Hematology Tech. 1 NAD  
Hematology Tech. 2 NAD

|                 |      |             |                     |
|-----------------|------|-------------|---------------------|
| HGB             | 16.5 | 13.0 - 20.0 | G/dl                |
| HGB (cell)      | 17.7 | 13 - 20     | G/dl                |
| HCT             | 51   | 40 - 55     | %                   |
| RBC             | 7.54 | 5.5 - 8.5   | 10 <sup>6</sup> /ul |
| MCV             | 67   | 62 - 74     | fl                  |
| RDW             | 14.2 | 12 - 15     | %                   |
| MCHC            | 32   | L 33 - 36   | G/dl                |
| CHCM            | 35   | 33 - 36     | G/dl                |
| PLATELETS       | 420  | 200 - 500   | 10 <sup>3</sup> /ul |
| MPV             | 11.6 | 7.5 - 14.6  | fl                  |
| NUCLEATED CELLS | 7.4  | 4.5 - 15.0  | 10 <sup>3</sup> /ul |

CBC-Differential Count

|                   |        |            |                     |    |
|-------------------|--------|------------|---------------------|----|
| NEUTROPHIL#       | 4.4    | 2.6 - 11   | NEUTROPHIL%         | 60 |
| LYMPHOCYTE#       | 2.1    | 1 - 4.8    | LYMPHOCYTE%         | 28 |
| MONOCYTE#         | 0.4    | 0.2 - 1.0  | MONOCYTE%           | 5  |
| EOSINOPHIL#       | 0.5    | 0.1 - 1.2  | EOSINOPHIL%         | 7  |
| NEUTROPHIL# auto  | 4.5    | 2.6 - 11.0 | 10 <sup>3</sup> /ul |    |
| Clumped Platelets | Absent |            |                     |    |

CAN

M

TOPICAL PROPRIETARY BIOLOGIC

dog 6

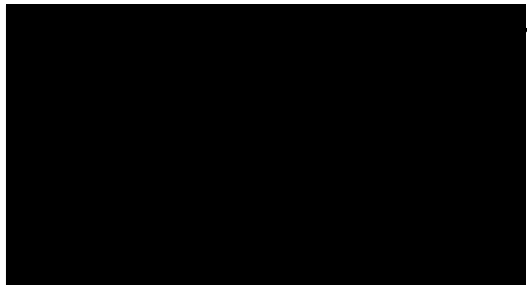

RADIATION THERAPY

Specimen: PTT/RTT  
Aquisition Site:

Printed: 08/21/20 11:55

EMR Accession #:

Collected: 08/21/2020 11:02

Accessioned: 08/21/2020 11:02

Completed: 08/21/20 11:55

CHEMISTRY  
RESEARCH SADP

|                           |       |             |         |
|---------------------------|-------|-------------|---------|
| Chemistry Results Status: | FINAL |             |         |
| Chemistry Tech.           | NAD   |             |         |
| GLUCOSE                   | 98    | 70 - 115    | mg/dL   |
| BUN                       | 11    | 7 - 30      | mg/dL   |
| CREATININE                | 0.7   | 0.6 - 1.6   | mg/dL   |
| PHOSPHORUS                | 4.1   | 2.5 - 6.0   | mg/dL   |
| CALCIUM                   | 9.7   | 9.0 - 11.5  | mg/dL   |
| MAGNESIUM                 | 1.8   | 1.8 - 2.4   | mg/dL   |
| Total Protein             | 5.6   | 5.0 - 7.0   | g/dL    |
| ALBUMIN                   | 3.4   | 3.0 - 4.3   | g/dL    |
| GLOBULIN                  | 2.2   | 1.5 - 3.2   | g/dL    |
| A/G RATIO                 | 1.55  | 0.9 - 2.4   | RATIO   |
| CHOLESTEROL               | 108   | L 130 - 300 | mg/dL   |
| CK                        | 145   | 50 - 275    | IU/L    |
| T-BILIRUBIN               | 0.1   | 0.0 - 0.2   | mg/dL   |
| ALP                       | 34    | 15 - 140    | IU/L    |
| ALT                       | 27    | 10 - 90     | IU/L    |
| AST                       | 39    | 15 - 45     | IU/L    |
| GGT                       | 3     | 0 - 9       | IU/L    |
| SODIUM                    | 144   | 142 - 152   | mEQ/L   |
| POTASSIUM                 | 4.40  | 3.9 - 5.4   | mEQ/L   |
| CHLORIDE                  | 110.2 | 108 - 118   | mEQ/L   |
| BICARB(HCO3-)             | 20.2  | 15 - 25     | mEQ/L   |
| ANION GAP                 | 18    | 12 - 23     | mmol/L  |
| CALC. OSMOLALITY          | 285   |             | mOsm/Kg |
| LIPEMIA                   | 3     | 0 - 80      | mg/dL   |
| HEMOLYSIS                 | 17    | 0 - 100     | mg/dL   |
| ICTERUS                   | 0     | 0 - 1       | mg/dL   |

Roche Cobas c501 analyzer results.

CAN

M

TOPICAL PROPRIETARY BIOLOGIC

dog 6

Specimen: PTT/RTT

Aquisition Site:

Printed: 08/21/20 11:57

RADIATION THERAPY

EMR Accession #:

Collected: 08/21/2020 11:02

Accessioned: 08/21/2020 11:02

Completed: 08/21/20 11:57

HEMATOLOGY

CBC Complete Blood Count

|                           |       |
|---------------------------|-------|
| Hematology Results Status | FINAL |
| Hematology Tech. 1        | KRA   |
| Hematology Tech. 2        | JMJ   |

|                 |      |             |                     |
|-----------------|------|-------------|---------------------|
| PLASMA PROTEIN  | 6.2  | 6.0 - 7.5   | g/dL                |
| HGB             | 17.5 | 13.0 - 20.0 | g/dL                |
| HGB (cell)      | 17.0 | 13 - 20     | g/dL                |
| HCT             | 52   | 40 - 55     | %                   |
| RBC             | 7.57 | 5.5 - 8.5   | 10 <sup>6</sup> /uL |
| MCV             | 68   | 62 - 74     | fl                  |
| RDW             | 13.5 | 12 - 15     | %                   |
| MCHC            | 34   | 33 - 36     | g/dL                |
| CHCM            | 33   | 33 - 36     | g/dL                |
| PLATELETS       | 339  | 200 - 500   | 10 <sup>3</sup> /uL |
| MPV             | 9.7  | 7.5 - 14.6  | fl                  |
| NUCLEATED CELLS | 10.9 | 4.5 - 15.0  | 10 <sup>3</sup> /uL |

CBC-Differential Count

|                   |        |             |                     |    |
|-------------------|--------|-------------|---------------------|----|
| NEUTROPHIL#       | 7.8    | 2.6 - 11    | NEUTROPHIL%         | 72 |
| LYMPHOCYTE#       | 2.1    | 1 - 4.8     | LYMPHOCYTE%         | 19 |
| MONOCYTE#         | 0.7    | 0.2 - 1.0   | MONOCYTE%           | 6  |
| EOSINOPHIL#       | 0.2    | 0.1 - 1.2   | EOSINOPHIL%         | 2  |
| nRBC#             | 0.1    | H 0 - 0.001 | nRBC%               | 1  |
| NEUTROPHIL# auto  | 7.4    | 2.6 - 11.0  | 10 <sup>3</sup> /uL |    |
| Clumped Platelets | Absent |             |                     |    |
| RBC Target Cells  | Few    |             |                     |    |

CAN

M

TOPICAL PROPRIETARY BIOLOGIC

dog 7

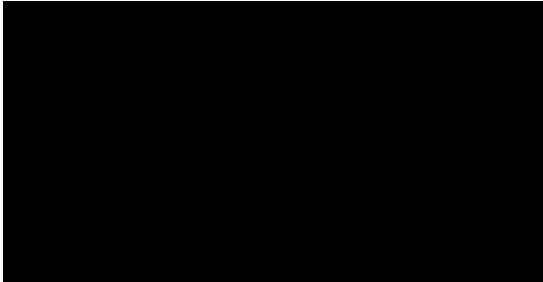

Specimen: RTT  
Aquisition Site:

Printed: 10/02/20 11:26

RT

EMR Accession #:

Collected: 10/02/2020 10:10

Accessioned: 10/02/2020 10:25

Completed: 10/02/20 11:26

CHEMISTRY  
RESEARCH SADP

|                           |       |            |         |
|---------------------------|-------|------------|---------|
| Chemistry Results Status: | FINAL |            |         |
| Chemistry Tech.           | KRA   |            |         |
| GLUCOSE                   | 109   | 70 - 115   | mg/dL   |
| BUN                       | 17    | 7 - 30     | mg/dL   |
| CREATININE                | 0.8   | 0.6 - 1.6  | mg/dL   |
| PHOSPHORUS                | 3.4   | 2.5 - 6.0  | mg/dL   |
| CALCIUM                   | 10.0  | 9.0 - 11.5 | mg/dL   |
| MAGNESIUM                 | 1.8   | 1.8 - 2.4  | mg/dL   |
| Total Protein             | 5.6   | 5.0 - 7.0  | g/dL    |
| ALBUMIN                   | 3.3   | 3.0 - 4.3  | g/dL    |
| GLOBULIN                  | 2.3   | 1.5 - 3.2  | g/dL    |
| A/G RATIO                 | 1.43  | 0.9 - 2.4  | RATIO   |
| CHOLESTEROL               | 164   | 130 - 300  | mg/dL   |
| CK                        | 98    | 50 - 275   | IU/L    |
| T-BILIRUBIN               | 0.1   | 0.0 - 0.2  | mg/dL   |
| ALP                       | 36    | 15 - 140   | IU/L    |
| ALT                       | 31    | 10 - 90    | IU/L    |
| AST                       | 19    | 15 - 45    | IU/L    |
| GGT                       | 2     | 0 - 9      | IU/L    |
| SODIUM                    | 144   | 142 - 152  | mEQ/L   |
| POTASSIUM                 | 4.23  | 3.9 - 5.4  | mEQ/L   |
| CHLORIDE                  | 111.4 | 108 - 118  | mEQ/L   |
| BICARB(HCO3-)             | 21.5  | 15 - 25    | mEQ/L   |
| ANION GAP                 | 15    | 12 - 23    | mmol/L  |
| CALC. OSMOLALITY          | 288   |            | mOsm/Kg |
| LIPEMIA                   | 4     | 0 - 80     | mg/dL   |
| HEMOLYSIS                 | 12    | 0 - 100    | mg/dL   |
| ICTERUS                   | 0     | 0 - 1      | mg/dL   |

Roche Cobas c501 analyzer results.

CAN

M

TOPICAL PROPRIETARY BIOLOGIC

dog 7

RT

Specimen: PTT  
Aquisition Site:

Printed: 10/02/20 11:35

EMR Accession #:

Collected: 10/02/2020 10:10

Accessioned: 10/02/2020 10:25

Completed: 10/02/20 11:35

### HEMATOLOGY

#### CBC Complete Blood Count

|                           |       |
|---------------------------|-------|
| Hematology Results Status | FINAL |
| Hematology Tech. 1        | LRJ   |
| Hematology Tech. 2        | JMJ   |

|                 |      |             |                     |
|-----------------|------|-------------|---------------------|
| PLASMA PROTEIN  | 6.4  | 6.0 - 7.5   | g/dL                |
| HGB             | 16.5 | 13.0 - 20.0 | g/dL                |
| HGB (cell)      | 16.1 | 13 - 20     | g/dL                |
| HCT             | 48   | 40 - 55     | %                   |
| RBC             | 6.78 | 5.5 - 8.5   | 10 <sup>6</sup> /uL |
| MCV             | 70   | 62 - 74     | fl                  |
| RDW             | 13.2 | 12 - 15     | %                   |
| MCHC            | 35   | 33 - 36     | g/dL                |
| CHCM            | 34   | 33 - 36     | g/dL                |
| PLATELETS       | 305  | 200 - 500   | 10 <sup>3</sup> /uL |
| MPV             | 12.0 | 7.5 - 14.6  | fl                  |
| NUCLEATED CELLS | 6.3  | 4.5 - 15.0  | 10 <sup>3</sup> /uL |

#### CBC-Differential Count

|                   |        |            |                     |    |
|-------------------|--------|------------|---------------------|----|
| NEUTROPHIL#       | 3.6    | 2.6 - 11   | NEUTROPHIL%         | 57 |
| LYMPHOCYTE#       | 1.8    | 1 - 4.8    | LYMPHOCYTE%         | 28 |
| MONOCYTE#         | 0.4    | 0.2 - 1.0  | MONOCYTE%           | 6  |
| EOSINOPHIL#       | 0.6    | 0.1 - 1.2  | EOSINOPHIL%         | 9  |
| NEUTROPHIL# auto  | 3.4    | 2.6 - 11.0 | 10 <sup>3</sup> /uL |    |
| Clumped Platelets | Absent |            |                     |    |

CAN

M

TOPICAL PROPRIETARY BIOLOGIC

dog 8

Specimen: 1 RTT  
Acquisition Site:

Printed: 11/13/20 11:39

EMR Accession #:

Collected: 11/13/2020 10:36

Accessioned: 11/13/2020 10:36

Completed: 11/13/20 11:39

CHEMISTRY  
RESEARCH SADP

|                           |       |             |         |
|---------------------------|-------|-------------|---------|
| Chemistry Results Status: | FINAL |             |         |
| Chemistry Tech.           | LRJ   |             |         |
| GLUCOSE                   | 93    | 70 - 115    | mg/dL   |
| BUN                       | 12    | 7 - 30      | mg/dL   |
| CREATININE                | 0.5   | L 0.6 - 1.6 | mg/dL   |
| PHOSPHORUS                | 4.1   | 2.5 - 6.0   | mg/dL   |
| CALCIUM                   | 10.3  | 9.0 - 11.5  | mg/dL   |
| MAGNESIUM                 | 1.8   | 1.8 - 2.4   | mg/dL   |
| Total Protein             | 5.9   | 5.0 - 7.0   | g/dL    |
| ALBUMIN                   | 3.6   | 3.0 - 4.3   | g/dL    |
| GLOBULIN                  | 2.3   | 1.5 - 3.2   | g/dL    |
| A/G RATIO                 | 1.57  | 0.9 - 2.4   | RATIO   |
| CHOLESTEROL               | 171   | 130 - 300   | mg/dL   |
| CK                        | 140   | 50 - 275    | IU/L    |
| T-BILIRUBIN               | 0.1   | 0.0 - 0.2   | mg/dL   |
| ALP                       | 107   | 15 - 140    | IU/L    |
| ALT                       | 20    | 10 - 90     | IU/L    |
| AST                       | 25    | 15 - 45     | IU/L    |
| GGT                       | 0     | 0 - 9       | IU/L    |
| SODIUM                    | 145   | 142 - 152   | mEQ/L   |
| POTASSIUM                 | 4.06  | 3.9 - 5.4   | mEQ/L   |
| CHLORIDE                  | 110.1 | 108 - 118   | mEQ/L   |
| BICARB(HCO3-)             | 21.1  | 15 - 25     | mEQ/L   |
| ANION GAP                 | 18    | 12 - 23     | mmol/L  |
| CALC. OSMOLALITY          | 287   |             | mOsm/Kg |
| LIPEMIA                   | 3     | 0 - 80      | mg/dL   |
| HEMOLYSIS                 | 54    | 0 - 100     | mg/dL   |
| ICTERUS                   | 0     | 0 - 1       | mg/dL   |

Roche Cobas c501 analyzer results.

CAN

M

TOPICAL PROPRIETARY BIOLOGIC

dog 8

Specimen: 1 PTT  
Aquisition Site:

Printed: 11/13/20 11:23

EMR Accession #:

Collected: 11/13/2020 10:36

Accessioned: 11/13/2020 10:36

Completed: 11/13/20 11:23

HEMATOLOGY  
CBC Complete Blood Count

Hematology Results Status FINAL  
Hematology Tech. 1 NAD  
Hematology Tech. 2 SSN

|                 |      |             |                     |
|-----------------|------|-------------|---------------------|
| HGB             | 18.0 | 13.0 - 20.0 | g/dL                |
| HGB (cell)      | 18.0 | 13 - 20     | g/dL                |
| HCT             | 54   | 40 - 55     | %                   |
| RBC             | 7.67 | 5.5 - 8.5   | 10 <sup>6</sup> /uL |
| MCV             | 71   | 62 - 74     | fl                  |
| RDW             | 13.9 | 12 - 15     | %                   |
| MCHC            | 33   | 33 - 36     | g/dL                |
| CHCM            | 33   | 33 - 36     | g/dL                |
| PLATELETS       | 331  | 200 - 500   | 10 <sup>3</sup> /uL |
| MPV             | 10.5 | 7.5 - 14.6  | fl                  |
| NUCLEATED CELLS | 13.6 | 4.5 - 15.0  | 10 <sup>3</sup> /uL |

CBC-Differential Count

|                   |        |             |                     |    |
|-------------------|--------|-------------|---------------------|----|
| NEUTROPHIL#       | 9.7    | 2.6 - 11    | NEUTROPHIL%         | 71 |
| LYMPHOCYTE#       | 2.6    | 1 - 4.8     | LYMPHOCYTE%         | 19 |
| MONOCYTE#         | 0.8    | 0.2 - 1.0   | MONOCYTE%           | 6  |
| EOSINOPHIL#       | 0.4    | 0.1 - 1.2   | EOSINOPHIL%         | 3  |
| nRBC#             | 0.1    | H 0 - 0.001 | nRBC%               | 1  |
| NEUTROPHIL# auto  | 9.3    | 2.6 - 11.0  | 10 <sup>3</sup> /uL |    |
| Clumped Platelets | Absent |             |                     |    |



CAN

M

dog 9

TOPICAL PROPRIETARY BIOLOGIC

Specimen: PTT

Printed: 12/18/20 13:13

EMR Accession #:

Collected: 12/18/2020 12:09

Accessioned: 12/18/2020 12:09

Completed: 12/18/20 13:13

CBC Complete Blood Count

|                           |       |
|---------------------------|-------|
| Hematology Results Status | FINAL |
| Hematology Tech. 1        | TLW   |
| Hematology Tech. 2        | LTS   |

|                 |      |             |                     |
|-----------------|------|-------------|---------------------|
| HGB             | 19.5 | 13.0 - 20.0 | g/dL                |
| HGB (cell)      | 18.5 | 13 - 20     | g/dL                |
| HCT             | 58   | H 40 - 55   | %                   |
| RBC             | 8.28 | 5.5 - 8.5   | 10 <sup>6</sup> /uL |
| MCV             | 70   | 62 - 74     | fl                  |
| RDW             | 13.1 | 12 - 15     | %                   |
| MCHC            | 34   | 33 - 36     | g/dL                |
| CHCM            | 32   | L 33 - 36   | g/dL                |
| PLATELETS       | 380  | 200 - 500   | 10 <sup>3</sup> /uL |
| MPV             | 9.3  | 7.5 - 14.6  | fl                  |
| NUCLEATED CELLS | 11.3 | 4.5 - 15.0  | 10 <sup>3</sup> /uL |

CBC-Differential Count

|                   |        |             |                     |    |
|-------------------|--------|-------------|---------------------|----|
| NEUTROPHIL#       | 6.2    | 2.6 - 11    | NEUTROPHIL%         | 55 |
| LYMPHOCYTE#       | 3.2    | 1 - 4.8     | LYMPHOCYTE%         | 28 |
| MONOCYTE#         | 1.2    | H 0.2 - 1.0 | MONOCYTE%           | 11 |
| EOSINOPHIL#       | 0.7    | 0.1 - 1.2   | EOSINOPHIL%         | 6  |
| NEUTROPHIL# auto  | 6.3    | 2.6 - 11.0  | 10 <sup>3</sup> /uL |    |
| Clumped Platelets | Absent |             |                     |    |

CAN BEAGLE

M dog 9

TOPICAL PROPRIETARY BIOLOGIC

Specimen: RTT

Printed: 12/18/20 12:38

EMR Accession #:

Collected: 12/18/2020 12:09

Accessioned: 12/18/2020 12:09

Completed: 12/18/20 12:38

RESEARCH SADP

|                           |       |            |         |
|---------------------------|-------|------------|---------|
| Chemistry Results Status: | FINAL |            |         |
| Chemistry Tech.           | JMJ   |            |         |
| GLUCOSE                   | 82    | 70 - 115   | mg/dL   |
| BUN                       | 12    | 7 - 30     | mg/dL   |
| CREATININE                | 0.6   | 0.6 - 1.6  | mg/dL   |
| PHOSPHORUS                | 4.0   | 2.5 - 6.0  | mg/dL   |
| CALCIUM                   | 10.6  | 9.0 - 11.5 | mg/dL   |
| MAGNESIUM                 | 2.0   | 1.8 - 2.4  | mg/dL   |
| Total Protein             | 6.2   | 5.0 - 7.0  | g/dL    |
| ALBUMIN                   | 3.8   | 3.0 - 4.3  | g/dL    |
| GLOBULIN                  | 2.4   | 1.5 - 3.2  | g/dL    |
| A/G RATIO                 | 1.58  | 0.9 - 2.4  | RATIO   |
| CHOLESTEROL               | 182   | 130 - 300  | mg/dL   |
| CK                        | 116   | 50 - 275   | IU/L    |
| T-BILIRUBIN               | 0.1   | 0.0 - 0.2  | mg/dL   |
| ALP                       | 69    | 15 - 140   | IU/L    |
| ALT                       | 31    | 10 - 90    | IU/L    |
| AST                       | 23    | 15 - 45    | IU/L    |
| GGT                       | 4     | 0 - 9      | IU/L    |
| SODIUM                    | 145   | 142 - 152  | mEQ/L   |
| POTASSIUM                 | 4.21  | 3.9 - 5.4  | mEQ/L   |
| CHLORIDE                  | 110.2 | 108 - 118  | mEQ/L   |
| BICARB(HCO3-)             | 20.6  | 15 - 25    | mEQ/L   |
| ANION GAP                 | 18    | 12 - 23    | mmol/L  |
| CALC. OSMOLALITY          | 286   |            | mOsm/Kg |
| LIPEMIA                   | 4     | 0 - 80     | mg/dL   |
| HEMOLYSIS                 | 4     | 0 - 100    | mg/dL   |
| ICTERUS                   | 0     | 0 - 1      | mg/dL   |

Roche Cobas c501 analyzer results.

CAN BEAGLE

M

dog 10

TOPICAL PROPRIETARY BIOLOGIC

Specimen: PTT

Printed: 02/12/21 11:54

EMR Accession #:

Collected: 02/12/2021 10:57

Accessioned: 02/12/2021 10:57

Completed: 02/12/21 11:54

CBC Complete Blood Count

Hematology Results Status FINAL  
Hematology Tech. 1 JMJ  
Hematology Tech. 2 JMJ

|                 |      |             |                     |
|-----------------|------|-------------|---------------------|
| HGB             | 18.8 | 13.0 - 20.0 | g/dL                |
| HGB (cell)      | 18.2 | 13 - 20     | g/dL                |
| HCT             | 56   | H 40 - 55   | %                   |
| RBC             | 7.77 | 5.5 - 8.5   | 10 <sup>6</sup> /uL |
| MCV             | 71   | 62 - 74     | fl                  |
| RDW             | 13.5 | 12 - 15     | %                   |
| MCHC            | 34   | 33 - 36     | g/dL                |
| CHCM            | 33   | 33 - 36     | g/dL                |
| PLATELETS       | 275  | 200 - 500   | 10 <sup>3</sup> /uL |
| MPV             | 9.8  | 7.5 - 14.6  | fl                  |
| NUCLEATED CELLS | 11.8 | 4.5 - 15.0  | 10 <sup>3</sup> /uL |

CBC-Differential Count

|                   |        |            |                     |    |
|-------------------|--------|------------|---------------------|----|
| NEUTROPHIL#       | 8.1    | 2.6 - 11   | NEUTROPHIL%         | 69 |
| LYMPHOCYTE#       | 2.5    | 1 - 4.8    | LYMPHOCYTE%         | 21 |
| MONOCYTE#         | 0.8    | 0.2 - 1.0  | MONOCYTE%           | 7  |
| EOSINOPHIL#       | 0.4    | 0.1 - 1.2  | EOSINOPHIL%         | 3  |
| NEUTROPHIL# auto  | 8.0    | 2.6 - 11.0 | 10 <sup>3</sup> /uL |    |
| Clumped Platelets | Absent |            |                     |    |

CAN BEAGLE

M dog 10

TOPICAL PROPRIETARY BIOLOGIC

Specimen: RTT

Printed: 02/12/21 11:28

EMR Accession #:

Collected: 02/12/2021 10:57

Accessioned: 02/12/2021 10:57

Completed: 02/12/21 11:28

RESEARCH SADP

|                           |       |            |         |
|---------------------------|-------|------------|---------|
| Chemistry Results Status: | FINAL |            |         |
| Chemistry Tech.           | NAD   |            |         |
| GLUCOSE                   | 91    | 70 - 115   | mg/dL   |
| BUN                       | 16    | 7 - 30     | mg/dL   |
| CREATININE                | 0.6   | 0.6 - 1.6  | mg/dL   |
| PHOSPHORUS                | 4.3   | 2.5 - 6.0  | mg/dL   |
| CALCIUM                   | 10.3  | 9.0 - 11.5 | mg/dL   |
| MAGNESIUM                 | 2.0   | 1.8 - 2.4  | mg/dL   |
| Total Protein             | 5.9   | 5.0 - 7.0  | g/dL    |
| ALBUMIN                   | 3.5   | 3.0 - 4.3  | g/dL    |
| GLOBULIN                  | 2.4   | 1.5 - 3.2  | g/dL    |
| A/G RATIO                 | 1.46  | 0.9 - 2.4  | RATIO   |
| CHOLESTEROL               | 220   | 130 - 300  | mg/dL   |
| CK                        | 91    | 50 - 275   | IU/L    |
| T-BILIRUBIN               | 0.0   | 0.0 - 0.2  | mg/dL   |
| ALP                       | 57    | 15 - 140   | IU/L    |
| ALT                       | 18    | 10 - 90    | IU/L    |
| AST                       | 19    | 15 - 45    | IU/L    |
| GGT                       | 2     | 0 - 9      | IU/L    |
| SODIUM                    | 146   | 142 - 152  | mEQ/L   |
| POTASSIUM                 | 4.19  | 3.9 - 5.4  | mEQ/L   |
| CHLORIDE                  | 111.2 | 108 - 118  | mEQ/L   |
| BICARB(HCO3-)             | 20.0  | 15 - 25    | mEQ/L   |
| ANION GAP                 | 19    | 12 - 23    | mmol/L  |
| CALC. OSMOLALITY          | 290   |            | mOsm/Kg |
| LIPEMIA                   | 4     | 0 - 80     | mg/dL   |
| HEMOLYSIS                 | 8     | 0 - 100    | mg/dL   |
| ICTERUS                   | 0     | 0 - 1      | mg/dL   |

Roche Cobas c501 analyzer results.
